# Supplementary material for: Maternal and perinatal outcomes in women planning vaginal birth after caesarean (VBAC) at home in England: secondary analysis of the Birthplace national prospective cohort study
Source: PubMed Central journal article supplement — BJOG. 2015 Jul 23;123(7):1123–32. doi: 10.1111/1471-0528.13546 (PMC5014182; doi:10.1111/1471-0528.13546), 2015-07-23
Supplement: BJO-123-1123-s002.pdf [file BJO-123-1123-s002.pdf]

**Table S1.** Gestational age and baby's birthweight in women planning VBAC at home or in an obstetric unit

|                                    | Para 1      |                |              |                | Para ≥2     |                |               |                | All          |                |               |                |
|------------------------------------|-------------|----------------|--------------|----------------|-------------|----------------|---------------|----------------|--------------|----------------|---------------|----------------|
|                                    | OU<br>n=787 |                | Home<br>n=87 |                | OU<br>n=440 |                | Home<br>n=122 |                | OU<br>n=1227 |                | Home<br>n=209 |                |
|                                    | n           | % <sup>1</sup> | n            | % <sup>1</sup> | n           | % <sup>1</sup> | n             | % <sup>1</sup> | n            | % <sup>1</sup> | n             | % <sup>1</sup> |
| <b>Gestation (completed weeks)</b> |             |                |              |                |             |                |               |                |              |                |               |                |
| 37                                 | 45          | 6.4            | 2            | 2.0            | 38          | 8.1            | 2             | 1.2            | 83           | 7.0            | 4             | 1.5            |
| 38                                 | 106         | 13.9           | 7            | 8.4            | 46          | 10.2           | 22            | 18.6           | 152          | 12.5           | 29            | 14.6           |
| 39                                 | 175         | 22.7           | 19           | 20.1           | 107         | 24.3           | 23            | 17.3           | 282          | 23.3           | 42            | 18.4           |
| 40                                 | 262         | 32.9           | 28           | 30.5           | 159         | 37.4           | 55            | 46.8           | 421          | 34.6           | 83            | 40.4           |
| 41                                 | 181         | 22.3           | 25           | 32.9           | 84          | 19.4           | 19            | 15.6           | 265          | 21.2           | 44            | 22.3           |
| 42                                 | 14          | 1.8            | 6            | 6.2            | 2           | 0.6            | 1             | 0.6            | 16           | 1.3            | 7             | 2.8            |
| 43-44+ <sup>0</sup> day            | 1           | 0.2            | 0            | 0.0            | 0           | 0.0            | 0             | 0.0            | 1            | 0.1            | 0             | 0.0            |
| Missing                            | 3           |                | 0            |                | 4           |                | 0             |                | 7            |                | 0             |                |
| <b>Birthweight (grams)</b>         |             |                |              |                |             |                |               |                |              |                |               |                |
| Less than 2500g                    | 17          | 2.4            | 0            | 0.0            | 10          | 2.0            | 1             | 0.6            | 27           | 2.3            | 1             | 0.4            |
| 2500-2999g                         | 96          | 12.3           | 7            | 8.3            | 69          | 14.8           | 6             | 5.6            | 165          | 13.2           | 13            | 6.6            |
| 3000-3499g                         | 322         | 41.8           | 25           | 30.5           | 179         | 41.8           | 50            | 42.8           | 501          | 41.8           | 75            | 38.0           |
| 3500-3999g                         | 234         | 28.7           | 28           | 29.4           | 136         | 30.6           | 43            | 33.1           | 370          | 29.4           | 71            | 31.7           |
| 4000-4499g                         | 101         | 13.0           | 25           | 28.5           | 37          | 9.2            | 18            | 13.7           | 138          | 11.6           | 43            | 19.4           |
| ≥4500g                             | 15          | 1.7            | 2            | 3.3            | 8           | 1.6            | 4             | 4.2            | 23           | 1.7            | 6             | 3.9            |
| Missing                            | 2           |                | 0            |                | 1           |                | 0             |                | 3            |                | 0             |                |

<sup>1</sup> Weighted percentage. Note that weighting can result in percentages differing slightly for events occurring with equal frequencies, particularly when numbers are small (see methods).

<sup>2</sup> WHO obesity classes. Note that women with a BMI of 35 kg/m<sup>2</sup> fall within WHO obesity class II (BMI 35.0-39.9) but only women with a BMI >35 kg/m<sup>2</sup> are defined as 'higher risk' under the NICE guideline criteria.

**Table S2.** Prevalence of additional pre-existing risk factors and ‘complicating conditions’ in women planning VBAC by parity and planned place of birth

|                                                                            | Para 1      |                | Para ≥2      |                |             |                | All           |                |              |                |               |                |
|----------------------------------------------------------------------------|-------------|----------------|--------------|----------------|-------------|----------------|---------------|----------------|--------------|----------------|---------------|----------------|
|                                                                            | OU<br>n=787 |                | Home<br>n=87 |                | OU<br>n=440 |                | Home<br>n=122 |                | OU<br>n=1227 |                | Home<br>n=209 |                |
|                                                                            | n           | % <sup>1</sup> | n            | % <sup>1</sup> | n           | % <sup>1</sup> | n             | % <sup>1</sup> | n            | % <sup>1</sup> | n             | % <sup>1</sup> |
| <b>Any additional risk factors</b> <sup>2</sup>                            |             |                |              |                |             |                |               |                |              |                |               |                |
| No                                                                         | 634         | 80.6           | 73           | 84.7           | 300         | 68.9           | 97            | 81.7           | 934          | 76.2           | 170           | 82.8           |
| Yes                                                                        | 150         | 19.4           | 14           | 15.3           | 138         | 31.1           | 25            | 18.3           | 288          | 23.8           | 39            | 17.2           |
| Any additional medical risk factor                                         | 49          | 6.8            | 3            | 3.0            | 55          | 11.8           | 5             | 4.7            | 104          | 8.7            | 8             | 4.0            |
| Any additional obstetric risk factor                                       | 111         | 14.0           | 11           | 12.4           | 99          | 22.8           | 21            | 14.3           | 210          | 17.2           | 32            | 13.5           |
| <b>Presence of ‘complicating conditions’</b> <sup>3</sup>                  |             |                |              |                |             |                |               |                |              |                |               |                |
| No                                                                         | 615         | 78.1           | 79           | 91.3           | 345         | 78.8           | 113           | 92.4           | 960          | 78.3           | 192           | 92.0           |
| Yes                                                                        | 168         | 22.0           | 8            | 8.7            | 92          | 21.2           | 8             | 7.6            | 260          | 21.7           | 16            | 8.0            |
| Missing                                                                    | 4           |                | 0            |                | 3           |                | 1             |                | 7            |                | 1             |                |
| <b>Presence of pre-existing risk factors and ‘complicating conditions’</b> |             |                |              |                |             |                |               |                |              |                |               |                |
| No additional risk factors or complicating conditions                      | 510         | 64.8           | 67           | 78.4           | 251         | 57.9           | 91            | 75.9           | 761          | 62.2           | 158           | 76.9           |
| Additional risk factors only                                               | 103         | 13.3           | 12           | 12.9           | 93          | 21.4           | 22            | 16.5           | 196          | 16.3           | 34            | 15.1           |
| Complicating conditions only                                               | 120         | 15.6           | 6            | 6.3            | 47          | 11.1           | 5             | 5.7            | 167          | 14.0           | 11            | 6.0            |
| Pre-existing risk factors and complicating conditions                      | 47          | 6.3            | 2            | 2.4            | 44          | 9.6            | 3             | 1.9            | 91           | 7.5            | 5             | 2.1            |

<sup>1</sup> Weighted percentage. Note that weighting can result in percentages differing slightly for events occurring with equal frequencies, particularly when numbers are small (see methods).

<sup>2</sup> Risk factors are listed in Table S2 below.

<sup>3</sup> Complicating conditions noted by the attending midwife at the start of care in labour including: prolonged rupture of membranes > 18 hours; meconium stained liquor, proteinuria 1+ or more, hypertension, abnormal vaginal bleeding, non-cephalic presentation, abnormal fetal heart rate.

**Table S3.** Clinical risk factors in women planning VBAC by planned place of birth

| Risk factors                                    | OU<br>n=1227 |                | Home<br>n=209 |                |
|-------------------------------------------------|--------------|----------------|---------------|----------------|
|                                                 | n            | % <sup>1</sup> | n             | % <sup>1</sup> |
| <b>Cardiovascular</b>                           |              |                |               |                |
| Confirmed cardiac disease                       | 1            | <1%            | 0             | 0.0            |
| Hypertensive disorders                          | 12           | 1.0            | 0             | 0.0            |
| <b>Respiratory</b>                              |              |                |               |                |
| Asthma*                                         | 3            | <1%            | 0             | 0.0            |
| <b>Haematological</b>                           |              |                |               |                |
| Haemoglobinopathies*                            | 1            | <1%            | 1             | <1%            |
| Thromboembolic disorders                        | 8            | <1%            | 1             | <1%            |
| Atypical antibodies*                            | 8            | <1%            | 0             | 0.0            |
| <b>Infective</b>                                |              |                |               |                |
| Group B strep*                                  | 55           | 4.8            | 5             | 2.5            |
| Hepatitis B/C/w abnormal LFT                    | 2            | <1%            | 0             | 0.0            |
| HIV                                             | 1            | <1%            | 0             | 0.0            |
| <b>Endocrine</b>                                |              |                |               |                |
| Hyperthyroidism                                 | 8            | <1%            | 0             | 0.0            |
| Diabetes                                        | 4            | <1%            | 0             | 0.0            |
| <b>Renal</b>                                    |              |                |               |                |
| Renal disease*                                  | 1            | <1%            | 0             | 0.0            |
| <b>Neurological</b>                             |              |                |               |                |
| Epilepsy                                        | 2            | <1%            | 0             | 0.0            |
| Previous cerebrovascular accident               | 1            | <1%            | 0             | 0.0            |
| <b>Gastrointestinal</b>                         |              |                |               |                |
| Liver disease*                                  | 2            | <1%            | 0             | 0.0            |
| <b>Other medical</b>                            |              |                |               |                |
|                                                 | 6            | <1%            | 1             | <1%            |
| <b>Previous complications</b>                   |              |                |               |                |
| Unexplained stillbirth/neonatal death*          | 12           | 1.0            | 1             | <1%            |
| Pre-eclampsia requiring preterm birth           | 22           | 2.1            | 1             | <1%            |
| Placental abruption*                            | 3            | <1%            | 2             | <1%            |
| Eclampsia                                       | 4            | <1%            | 0             | 0.0            |
| Uterine rupture                                 | 2            | <1%            | 0             | 0.0            |
| PPH with treatment/ transfusion                 | 22           | 1.9            | 9             | 3.9            |
| Retained placenta*                              | 11           | <1%            | 2             | <1%            |
| Shoulder dystocia                               | 1            | <1%            | 1             | <1%            |
| <b>Current pregnancy</b>                        |              |                |               |                |
| Pre-eclampsia or pregnancy induced hypertension | 15           | 1.2            | 1             | <1%            |
| Preterm labour or preterm PROM                  | 2            | <1%            | 1             | <1%            |
| Placental abruption                             | 3            | <1%            | 0             | 0.0            |
| Anaemia*                                        | 4            | <1%            | 0             | 0.0            |
| Substance misuse                                | 6            | <1%            | 0             | 0.0            |
| Alcohol dependency *                            | 0            | 0.0            | 1             | <1%            |
| Gestational diabetes                            | 27           | 2.3            | 4             | 1.8            |
| Malpresentation                                 | 4            | <1%            | 1             | <1%            |
| BMI>35 kg/m <sup>2</sup>                        | 73           | 5.7            | 6             | 2.7            |

|                                        |    |     |   |     |
|----------------------------------------|----|-----|---|-----|
| Recurrent antepartum haemorrhage       | 1  | <1% | 0 | 0.0 |
| Post-term (42 <sup>+1</sup> -44 weeks) | 11 | <1% | 4 | 1.5 |
| <b>Fetal</b>                           |    |     |   |     |
| Small for gestational age*             | 7  | <1% | 2 | <1% |
| Abnormal fetal heart rate*             | 4  | <1% | 0 | 0.0 |
| Oligo/polyhydramnios*                  | 8  | <1% | 1 | <1% |
| <b>Other obstetric or fetal</b>        | 6  | <1% | 2 | <1% |

\* Some risk factor descriptions have been shortened. See NICE intrapartum care guideline for fuller description of marked risk factors.

<sup>1</sup> Probability weights are incorporated to account for differences in the probability of a woman being selected for inclusion in the study arising from differences in each unit/trust's period of participation and the stratum specific probabilities of selection of OUs.

**Table S4.** ‘Complicating conditions’ in women planning VBAC by planned place of birth

| ‘Complicating conditions’ noted by the attending midwife at the start of care in labour | OU<br>n=1227 |                | Home<br>n=209 |                |
|-----------------------------------------------------------------------------------------|--------------|----------------|---------------|----------------|
|                                                                                         | n            | % <sup>1</sup> | n             | % <sup>1</sup> |
| Prolonged rupture of membranes >18 hours                                                | 63           | 5.5            | 5             | 2.3            |
| Meconium stained liquor                                                                 | 94           | 7.5            | 8             | 4.8            |
| Proteinuria 1+ or more                                                                  | 27           | 2.1            | 1             | <1%            |
| Hypertension*                                                                           | 38           | 3.2            | 1             | <1%            |
| Abnormal vaginal bleeding                                                               | 17           | 1.4            | 1             | <1%            |
| Non-cephalic presentation                                                               | 11           | 1.1            | 0             | 0.0            |
| Abnormal fetal heart rate                                                               | 46           | 3.8            | 1             | <1%            |
| Other complications                                                                     | 6            | <1%            | 0             | 0.0            |

\* Some risk factor descriptions have been shortened. See NICE intrapartum care guideline for fuller description of marked risk factors.

<sup>1</sup> Probability weights are incorporated to account for differences in the probability of a woman being selected for inclusion in the study arising from differences in each unit/trust’s period of participation and the stratum specific probabilities of selection of OUs.

**Table S5.** Transfers in women planning VBAC at home

|                                             | Para 1<br>n=87 |                | Para ≥2<br>n=122 |                | All<br>n=209 |                |
|---------------------------------------------|----------------|----------------|------------------|----------------|--------------|----------------|
|                                             | n              | % <sup>1</sup> | n                | % <sup>1</sup> | n            | % <sup>1</sup> |
| Not transferred                             | 37             | 43.3           | 90               | 75.4           | 127          | 62.9           |
| <b>Transfers before birth (total)</b>       | <b>40</b>      | <b>45.7</b>    | <b>23</b>        | <b>17.9</b>    | <b>63</b>    | <b>28.8</b>    |
| Failure to progress (1 <sup>st</sup> stage) | 10             | 10.9           | 5                | 2.9            | 15           | 6.0            |
| Fetal distress (1 <sup>st</sup> stage)      | 4              | 4.2            | 2                | 2.1            | 6            | 2.9            |
| Meconium staining                           | 7              | 7.5            | 2                | 3.8            | 9            | 5.2            |
| Epidural request                            | 2              | 2.2            | 2                | 1.2            | 4            | 1.6            |
| Malposition                                 | 0              | 0.0            | 1                | 0.6            | 1            | 0.4            |
| Antepartum haemorrhage                      | 1              | 1.4            | 2                | 1.3            | 3            | 1.4            |
| Failure to progress (2 <sup>nd</sup> stage) | 10             | 12.1           | 3                | 2.3            | 13           | 6.1            |
| Fetal distress (2 <sup>nd</sup> stage)      | 1              | 0.9            | 1                | 0.6            | 2            | 0.7            |
| Pain relief                                 | 1              | 1.3            | 2                | 1.1            | 3            | 1.2            |
| Risk factors and eligibility criteria       | 1              | 1.2            | 0                | 0.0            | 1            | 0.5            |
| Other maternal (before birth)               | 2              | 2.0            | 1                | 0.6            | 3            | 1.1            |
| Other fetal (before birth)                  | 1              | 2.1            | 2                | 1.4            | 3            | 1.7            |
| <b>Transfers after birth (total)</b>        | <b>10</b>      | <b>11.0</b>    | <b>9</b>         | <b>6.7</b>     | <b>19</b>    | <b>8.4</b>     |
| Postpartum haemorrhage                      | 3              | 3.2            | 1                | 0.6            | 4            | 1.6            |
| Retained placenta                           | 0              | 0.0            | 2                | 1.8            | 2            | 1.1            |
| Repair of perineal trauma                   | 7              | 7.8            | 1                | 0.7            | 8            | 3.4            |
| Neonatal concerns                           | 0              | 0.0            | 4                | 3.0            | 4            | 1.8            |
| Missing (after birth)                       | 0              | 0.0            | 1                | 0.8            | 1            | 0.5            |

<sup>1</sup> Weighted percentage. Note that weighting can result in percentages differing slightly for events occurring with equal frequencies, particularly when numbers are small (see methods).

**Table S6.** Mode of delivery in women planning VBAC by planned place of birth and parity

|                                                                | OU<br>n=1227 |                |             | Home<br>n=209 |                |             |
|----------------------------------------------------------------|--------------|----------------|-------------|---------------|----------------|-------------|
|                                                                | n            | % <sup>1</sup> | (95% CI)    | n             | % <sup>1</sup> | (95% CI)    |
| <b>All women planning VBAC</b>                                 |              |                |             |               |                |             |
| <b>Para 1</b>                                                  | <b>787</b>   |                |             | <b>87</b>     |                |             |
| Spontaneous vertex                                             | 332          | 41.3           | (37.7-44.9) | 60            | 69.3           | (59.8-77.5) |
| Vaginal breech                                                 | 1            | 0.2            | (0.0-1.2)   | 1             | 1.4            | (0.2-10.0)  |
| Ventouse                                                       | 86           | 10.7           | (8.5-13.5)  | 5             | 5.2            | (2.0-12.8)  |
| Forceps                                                        | 82           | 10.9           | (8.1-14.4)  | 1             | 0.9            | (0.1-6.2)   |
| Caesarean                                                      | 286          | 37.0           | (32.9-41.3) | 20            | 23.2           | (14.9-34.2) |
| <b>Para ≥2</b>                                                 | <b>440</b>   |                |             | <b>122</b>    |                |             |
| Spontaneous vertex                                             | 334          | 74.8           | (70.1-79.0) | 110           | 91.0           | (84.2-95.0) |
| Vaginal breech                                                 | 0            | 0              | -           | 1             | 0.6            | (0.1-4.4)   |
| Ventouse                                                       | 10           | 2.3            | (1.2-4.4)   | 2             | 1.4            | (0.3-5.8)   |
| Forceps                                                        | 8            | 2.2            | (1.1-4.5)   | 2             | 1.4            | (0.4-5.3)   |
| Caesarean                                                      | 88           | 20.7           | (16.6-25.6) | 7             | 5.6            | (2.4-12.3)  |
| <b>Overall</b>                                                 | <b>1227</b>  |                |             | <b>209</b>    |                |             |
| Spontaneous vertex                                             | 666          | 53.7           | (50.5-57.0) | 170           | 82.6           | (77.6-86.6) |
| Vaginal breech                                                 | 1            | 0.1            | (0.0-0.7)   | 2             | 0.9            | (0.2-3.9)   |
| Ventouse                                                       | 96           | 7.6            | (6.0-9.5)   | 7             | 2.9            | (1.3-6.6)   |
| Forceps                                                        | 90           | 7.7            | (5.9-9.8)   | 3             | 1.2            | (0.4-3.6)   |
| Caesarean                                                      | 374          | 30.9           | (27.4-34.8) | 27            | 12.4           | (8.7-17.4)  |
| <b>All women planning VBAC with no additional risk factors</b> |              |                |             |               |                |             |
| <b>Para 1</b>                                                  | <b>634</b>   |                |             | <b>73</b>     |                |             |
| Spontaneous vertex                                             | 269          | 41.7           | (37.5-45.9) | 51            | 70.7           | (60.5-79.2) |
| Vaginal breech                                                 | 0            | 0              | -           | 1             | 1.7            | (0.2-11.7)  |
| Ventouse                                                       | 77           | 12.0           | (9.3-15.5)  | 5             | 6.2            | (2.4-15.1)  |
| Forceps                                                        | 68           | 11.0           | (8.0-15.0)  | 1             | 1.0            | (0.1-7.3)   |
| Caesarean                                                      | 220          | 35.3           | (31.2-39.6) | 15            | 20.4           | (12.3-32.1) |
| <b>Para ≥2</b>                                                 | <b>300</b>   |                |             | <b>97</b>     |                |             |
| Spontaneous vertex                                             | 231          | 76.7           | (70.8-81.8) | 87            | 90.8           | (82.8-95.3) |
| Vaginal breech                                                 | 0            | 0              | -           | 1             | 0.8            | (0.1-5.4)   |
| Ventouse                                                       | 10           | 3.3            | (1.7-6.4)   | 1             | 0.7            | (0.1-5.0)   |
| Forceps                                                        | 6            | 2.7            | (1.2-5.7)   | 2             | 1.7            | (0.4-6.5)   |
| Caesarean                                                      | 53           | 17.3           | (12.5-23.6) | 6             | 6.1            | (2.5-14.2)  |
| <b>Overall</b>                                                 | <b>934</b>   |                |             | <b>170</b>    |                |             |
| Spontaneous vertex                                             | 500          | 53.4           | (49.9-56.9) | 138           | 82.8           | (76.9-87.4) |
| Vaginal breech                                                 | 0            | 0              | -           | 2             | 1.1            | (0.3-4.7)   |
| Ventouse                                                       | 87           | 9.1            | (7.1-11.6)  | 6             | 2.9            | (1.1-7.4)   |
| Forceps                                                        | 74           | 8.2            | (6.2-10.9)  | 3             | 1.4            | (0.5-4.3)   |
| Caesarean                                                      | 273          | 29.3           | (25.5-33.4) | 21            | 11.8           | (7.8-17.4)  |

<sup>1</sup> Weighted percentage

**Table S7.** Chance of vaginal birth in women planning VBAC by planned place of birth, parity and risk status

|                | Without additional pre-existing risk factors |                    |             |                                |                    |             | With additional pre-existing risk factors |                    |             |                                |                    |             |
|----------------|----------------------------------------------|--------------------|-------------|--------------------------------|--------------------|-------------|-------------------------------------------|--------------------|-------------|--------------------------------|--------------------|-------------|
|                | Without 'complicating conditions'            |                    |             | With 'complicating conditions' |                    |             | Without 'complicating conditions'         |                    |             | With 'complicating conditions' |                    |             |
|                | Events/Total                                 | Wgt % <sup>1</sup> | (95% CI)    | Events/Total                   | Wgt % <sup>1</sup> | (95% CI)    | Events/Total                              | Wgt % <sup>1</sup> | (95% CI)    | Events/Total                   | Wgt % <sup>1</sup> | (95% CI)    |
| <b>Overall</b> |                                              |                    |             |                                |                    |             |                                           |                    |             |                                |                    |             |
| OU             | 574/761                                      | 75.4               | (71.1-79.3) | 84/167                         | 50.3               | (42.0-58.5) | 134/196                                   | 67.4               | (58.5-75.2) | 55/91                          | 58.9               | (48.0-69.0) |
| Home           | 138/158                                      | 87.8               | (81.8-91.9) | 10/11                          | 93.6               | (61.9-99.3) | 30/34                                     | 88.6               | (73.9-95.5) | 3/5                            | 54.7               | (15.1-89.1) |
| <b>Para 1</b>  |                                              |                    |             |                                |                    |             |                                           |                    |             |                                |                    |             |
| OU             | 360/510                                      | 69.8               | (64.9-74.3) | 52/120                         | 43.8               | (35.1-52.9) | 59/103                                    | 56.4               | (44.8-67.2) | 27/47                          | 58.1               | (41.0-73.5) |
| Home           | 53/67                                        | 79.2               | (67.3-87.5) | 5/6                            | 84.5               | (34.5-98.3) | 9/12                                      | 73.4               | (43.8-90.7) | 0/2                            | 0                  | -           |
| <b>Para ≥2</b> |                                              |                    |             |                                |                    |             |                                           |                    |             |                                |                    |             |
| OU             | 214/251                                      | 86.2               | (79.8-90.8) | 32/47                          | 65.7               | (48.8-79.4) | 75/93                                     | 79.1               | (70.0-86.0) | 28/44                          | 59.7               | (43.5-74.1) |
| Home           | 85/91                                        | 93.4               | (84.7-97.4) | 5/5                            | 100.0              | -           | 21/22                                     | 96.1               | (75.2-99.5) | 3/3                            | 100.0              | -           |

<sup>1</sup> Weighted percentage
