# Supplementary figures and images for: Maternal and perinatal outcomes in women planning vaginal birth after caesarean (VBAC) at home in England: secondary analysis of the Birthplace national prospective cohort study
Source: PubMed Central journal article supplement — BJOG. 2015 Jul 23;123(7):1123–32. doi: 10.1111/1471-0528.13546 (PMC5014182; doi:10.1111/1471-0528.13546), 2015-07-23

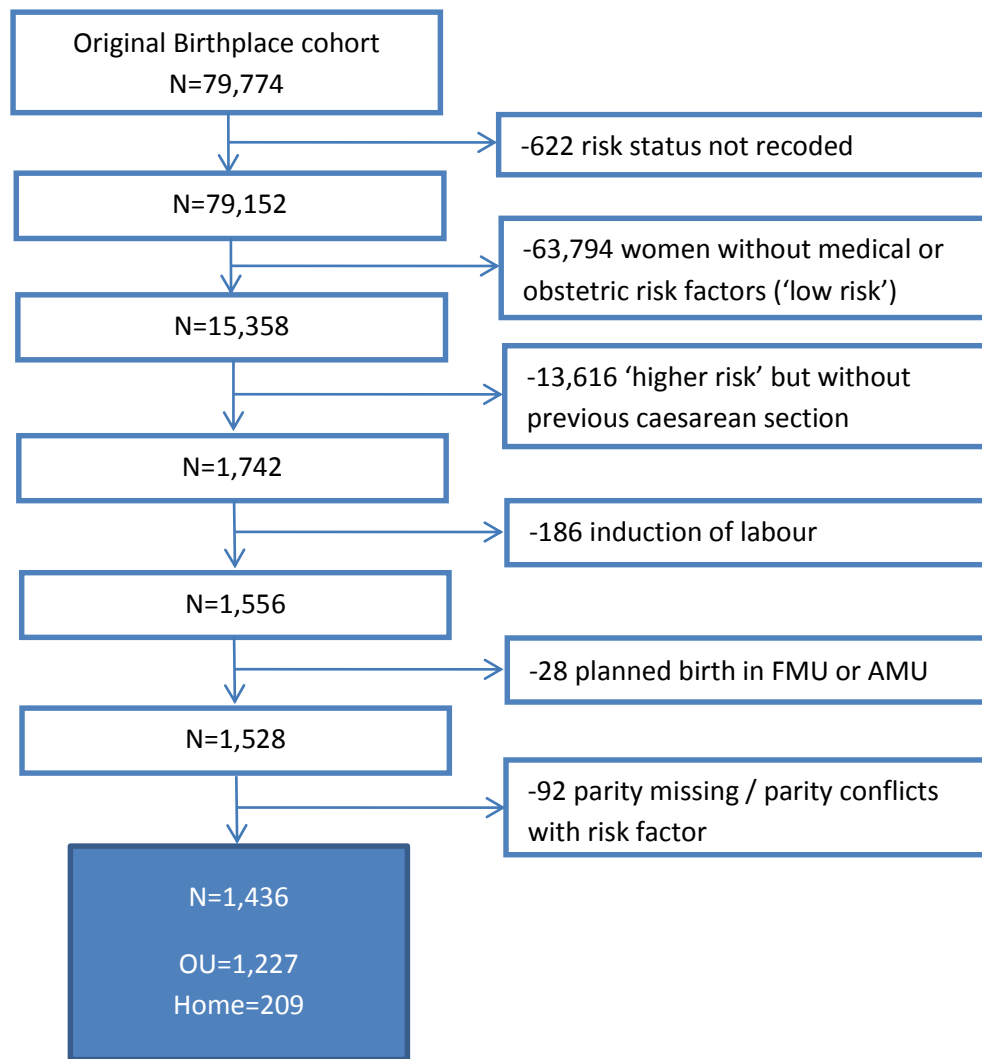

**Figure S1.** Study inclusion flow chart

Supplement: BJO-123-1123-s001.pdf [file BJO-123-1123-s001.pdf]
